# Supplementary material
Source: HighWire-hosted journal article supplement (http://molpharm.aspetjournals.org/highwire/filestream/77495/field_highwire_adjunct_files/0/Supplemental_104091.pdf)
Supplement: Supplemental_104091.pdf [file Supplemental_104091.pdf]

## Supplemental Materials for: Ginsenoside Rg3, a gating modifier of EAG family K<sup>+</sup> channels

Wei Wu, Alison Gardner, Frank B. Sachse and Michael C. Sanguinetti  
Molecular Pharmacology

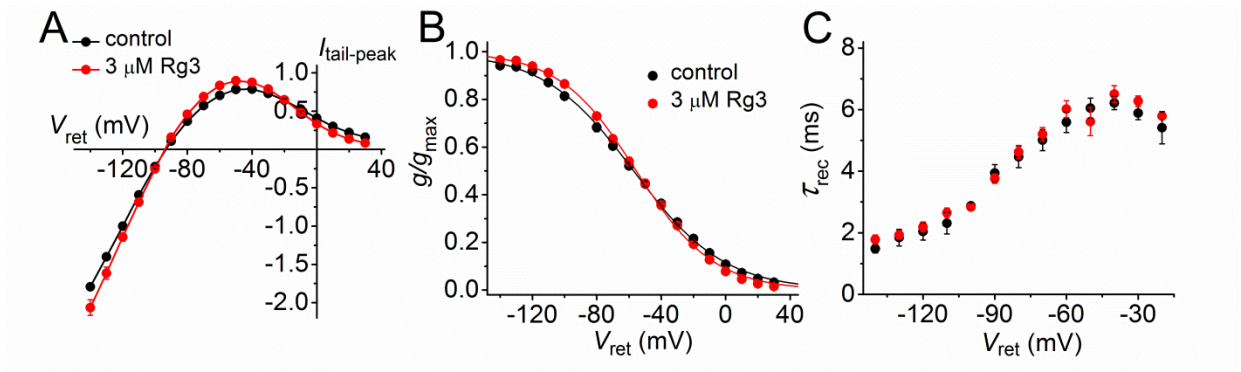

**Supplemental Figure 1. Inactivation of hERG1 channels is not altered by Rg3.** (A) Fully-activated  $I_{\text{tail-peak}}-V_{\text{ret}}$  relationships in the absence and presence of 3  $\mu\text{M}$  Rg3. Data were normalized relative to  $I_{\text{tail-peak}}$  at  $-120$  mV under control conditions (2-way ANOVA,  $p < 0.01$ ). (B) Rg3 does not affect voltage-dependence of hERG1 inactivation. Data were fitted with a Boltzmann function (smooth curve). For control,  $V_{0.5} = -57.2 \pm 1.2$  mV;  $k = 27.7 \pm 0.6$ . For 3  $\mu\text{M}$  Rg3,  $V_{0.5} = -56.1 \pm 1.3$  mV;  $k = 24.9 \pm 0.2$  (paired t-test,  $p = 0.2$ ). (C) Effect of Rg3 on  $\tau_{\text{rec}}$ , the time constant for recovery from hERG1 channel current inactivation (2-way ANOVA,  $p = 0.04$ ). For all panels,  $n = 5$ .

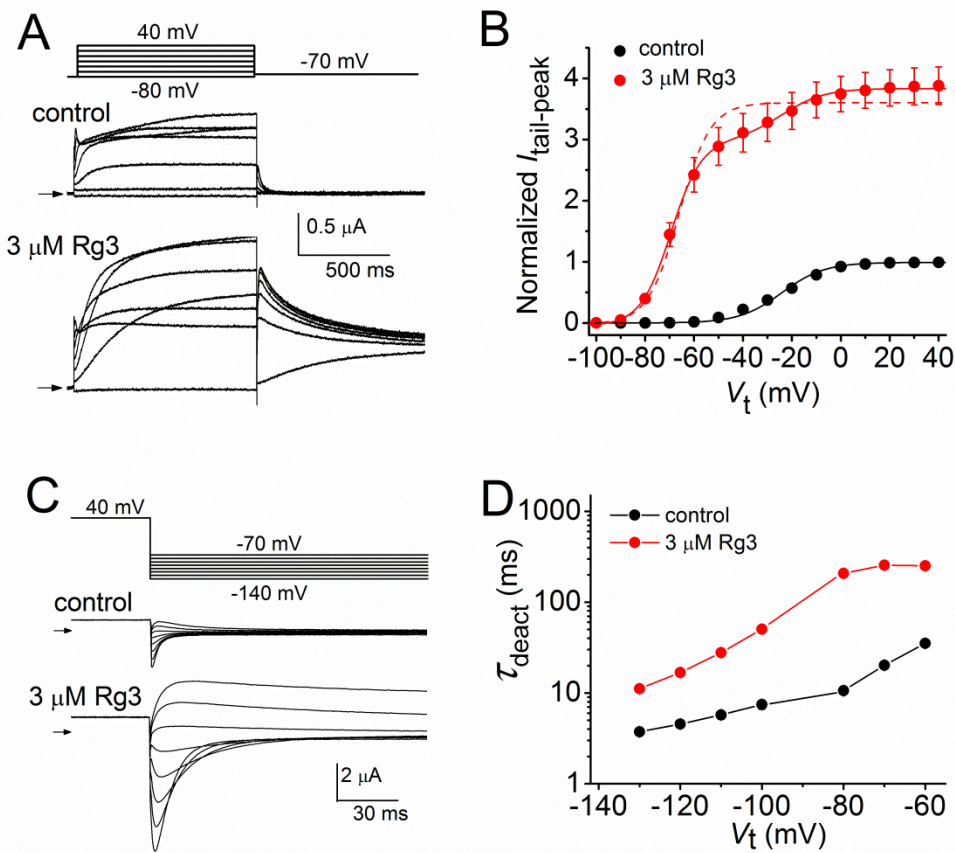

**Supplemental Figure 2. Concentration and voltage dependent effects of Rg3 on N-deleted and C-truncated hERG1 channel currents.** (A) Representative currents recorded from a single oocyte before (control) and after treatment with 3  $\mu\text{M}$  Rg3. Upper panel shows voltage pulse protocol. (B) Effects of 3  $\mu\text{M}$  Rg3 on voltage dependence of N/C-del hERG1 channel activation using 1 s test pulses.  $I_{\text{tail-peak}}$  in the presence of Rg3 was normalized relative to the maximum  $I_{\text{tail-peak}}$  measured under control condition ( $n = 11$ ). Control data were fitted with a single Boltzmann function ( $V_{0.5} = -25.5 \pm 1.6$  mV,  $k = 10.3 \pm 0.2$ ). Rg3 data were poorly fit using a single Boltzmann function (dashed smooth curve).  $G$ - $V$  relationships measured after application of Rg3 were fitted with the sum of two Boltzmann functions, with component “1” assumed to represent unbound channels having  $V_{0.5}$  and  $k$  fixed at control values and component “2” assumed to represent the Rg3-bound fraction of channels. For 3  $\mu\text{M}$  Rg3:  $A_{\text{max}1} = 0.25$ ,  $A_{\text{max}2} = 0.75$ ,  $V_{0.5(2)} = -69.1 \pm 0.6$  mV,  $k_2 = 6.1 \pm 0.2$ . (C) Representative tail currents recorded in an oocyte under control conditions and after treatment with 3  $\mu\text{M}$  Rg3. Upper panel shows voltage pulse protocol. (D) Effect of 3  $\mu\text{M}$  Rg3 on the time constants for current deactivation ( $\tau_{\text{deact}}$ ) ( $n = 7$ ; 2-way ANOVA,  $p < 0.0001$ ).

Figure S3

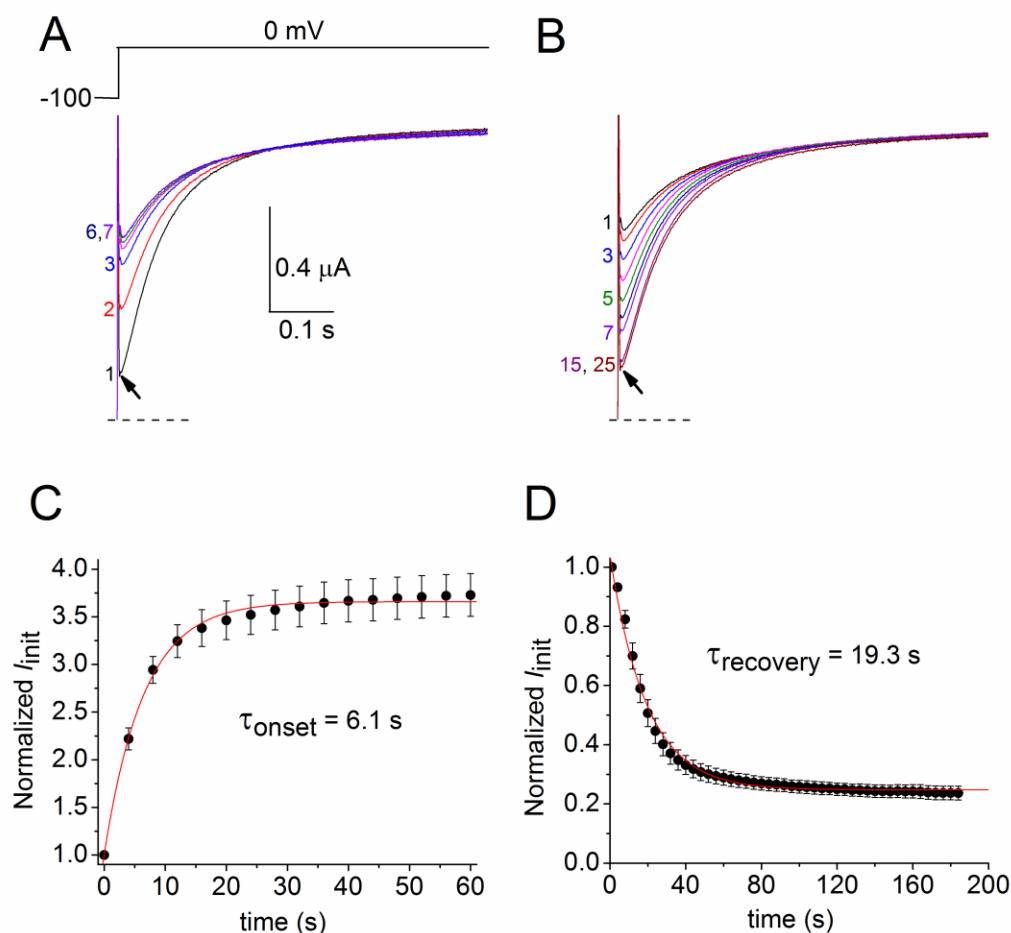

**Supplemental Figure 3. Onset of and recovery from effects of Rg3 on hELK1 channels.** (A) Onset of 0.3  $\mu\text{M}$  Rg3 effects on hELK1 channel currents measured during repetitive pulsing to 0 mV from a holding potential of  $-100$  mV. Pulses (0.6 s duration) were applied once every 4 s. After applying 10 pulses under control conditions, the bath solution was rapidly switched to a solution containing Rg3. Plot shows individual current traces recorded in response to the 10<sup>th</sup> control pulse (labeled “1”) and subsequent pulsing after solution switching (labeled “2”, etc). All 10 control currents were superimposable (not shown). The initial outward current ( $I_{\text{init}}$ , indicated by arrow) was measured immediately after the outward capacitance current transient. (B) Current traces recorded in the presence of 0.3  $\mu\text{M}$  Rg3 (labeled “1”) and subsequent pulses after initiation of solution washout (labeled “2..3..7, etc”). In panels B and C, dotted line represents zero current level. (C) Currents were normalized to  $I_{\text{init}}$  under control conditions and plotted as a function of time after switching chamber perfusate from control solution to 0.3  $\mu\text{M}$  Rg3 solution. The data were fitted with a single exponential function to estimate the time constant for onset of Rg3 action ( $\tau_{\text{onset}} = 6.1 \pm 0.8$  s,  $n = 10$ ). (D) Kinetics of recovery of  $I_{\text{init}}$  during rapid washout of 0.3  $\mu\text{M}$  Rg3 solution ( $\tau_{\text{recovery}} = 19.3 \pm 1.8$  s,  $n = 10$ ). Currents were normalized to  $I_{\text{init}}$  measured in the presence of Rg3.

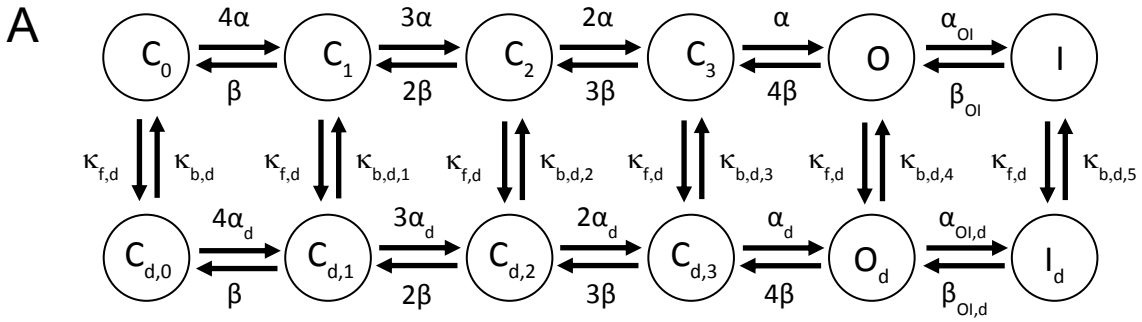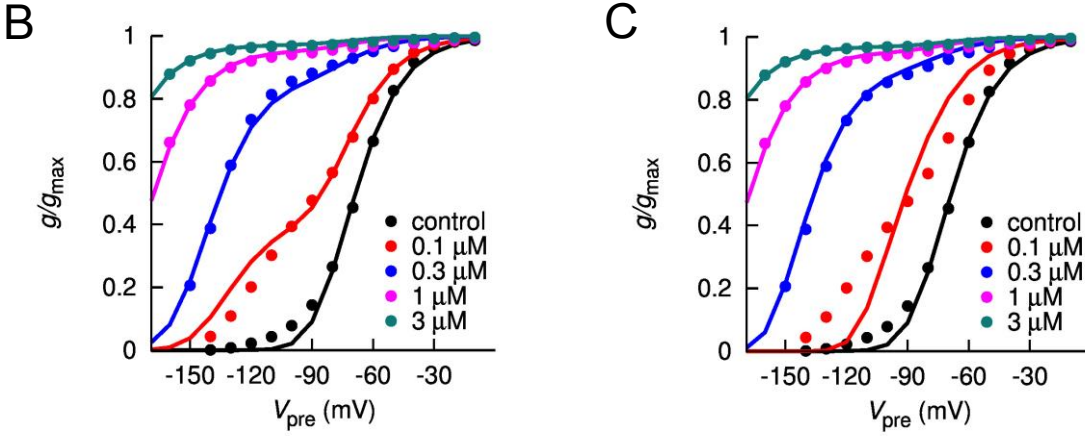

**Supplemental Figure 4. Comparison of simulated G-V relationships for hELK1 activation. (A)** Schematic of two-compartment Markov model. The two compartments,  $C_0 \dots I$  and  $C_{d,0} \dots I_d$ , represent channels in the absence of Rg3 and populations of channels in the presence of Rg3. Note that  $\kappa_{i,d} = \kappa_{i,0} [Rg3]$ . G-V relationships were simulated with rate coefficients  $\kappa_{f,d}, \kappa_{b,d}, \kappa_{b,d,1}, \dots, \kappa_{b,d,5}$  decreased to 1% (B) or increased 100 times (C).

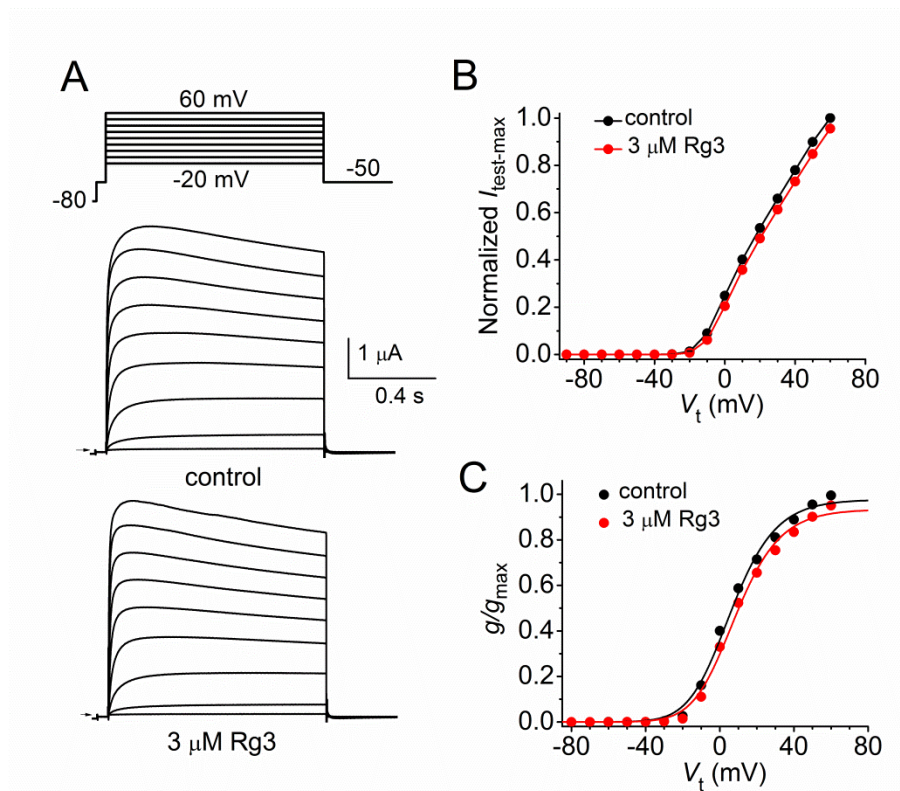

**Supplemental Figure 5. Rg3 does not alter gating of Kv1.5 channels.** (A) Representative Kv1.5 channel currents recorded in a single oocyte under control conditions and after treatment with 3 μM Rg3. Upper panel show voltage pulse protocol used to elicit currents. (B)  $I_{\text{test-max}}-V_t$  relationships measured in the absence and presence of 3 μM Rg3. Currents were normalized to the control current at +60 mV ( $n = 10$ ). (C) Voltage dependence of Kv1.5 channel activation ( $n = 10$ ). Data were fitted with a Boltzmann function to the 2nd power (smooth curves). For control,  $V_{0.5} = -6.0 \pm 0.9$  mV and  $k = 13.8 \pm 1.0$ . For Rg3,  $V_{0.5} = -4.0 \pm 0.9$  mV and  $k = 13.9 \pm 1.0$ . In panels B and C, SEM bars are smaller than symbol size.

| Feature                 | Weighting Factor | Control |
|-------------------------|------------------|---------|
| $I_{test-max}$          | 4                | 0.396   |
| $\tau_{test-s}$         | 1                | 0.144   |
| $\tau_{inact-s}$        | 1                | 0.229   |
| $A_{deact}$             | 2                | 0.483   |
| $\tau_{deact-s}$        | 1                | 0.292   |
| $\tau_{deact-s}$        | 1                | 0.140   |
| $1-I_{inact-max}$       | 2                | 0.235   |
| $g_{test}/g_{test-max}$ | 4                | 0.301   |
| $1-g_{test,-10mV}$      | 0.5              | 0.105   |
| $C_0+C_1+C_2+C_3$       | 20               | 0.249   |
| O+I                     | 1                | 0.000   |

Table S1: Features for model fitting and their fit errors  $E_i = \frac{\|f_{m,i} - f_{c,i}\|_2}{\|f_{c,i}\|_2}$ . Weighting factors were applied to emphasize or deemphasize features.

| States                                         | Symbol            | Value |
|------------------------------------------------|-------------------|-------|
| 0 <sup>th</sup> closed state                   | $C_0$             | 1     |
| 1 <sup>st</sup> – 3 <sup>rd</sup> closed state | $C_1, \dots, C_3$ | 0     |
| Open state                                     | O                 | 0     |
| Inactivated state                              | I                 | 0     |

Table S2: Initial values for model.

| Parameter               | Symbol          | Control | Unit            |
|-------------------------|-----------------|---------|-----------------|
| C-C and C-O transitions | $\alpha_0$      | 43.847  | s <sup>-1</sup> |
|                         | $z_\alpha$      | 0.559   |                 |
|                         | $\beta_0$       | 0.025   | s <sup>-1</sup> |
|                         | $z_\beta$       | 1.157   |                 |
| O-I transitions         | $\alpha_{OI}$   | 1.167   | s <sup>-1</sup> |
|                         | $z_{\alpha OI}$ | -0.235  |                 |
|                         | $\beta_{OI}$    | 5.504   | s <sup>-1</sup> |
|                         | $z_{\beta OI}$  | 0.220   |                 |

Table S3: Rate constant parameters for model.

| [Rg3]       | Scaling $\alpha_{0,d}$ | [Rg3] $\kappa_{f0,d}$ |
|-------------|------------------------|-----------------------|
| 0 $\mu$ M   | $10^{0.1}$             | 0                     |
| 0.1 $\mu$ M | $10^{1.8}$             | 0.0043                |
| 0.3 $\mu$ M | $10^{2.2}$             | 0.0167                |
| 1 $\mu$ M   | $10^{3.1}$             | 0.0256                |
| 3 $\mu$ M   | $10^{3.7}$             | 0.0300                |

Table S4: Scaling factors for  $\alpha_{0,d}$  and  $[Rg3]\kappa_{f0,d}$  of two-compartment model.
